# Supplementary material for: The effects of gratitude interventions: a systematic review and meta-analysis
Source: PubMed Central journal article supplement (PMC10393216; doi:10.31744/einstein_journal/2023rw0371), 2023-07-31
Supplement: 2317-6385-eins-21-eRW0371-suppl01.pdf [file 2317-6385-eins-21-eRW0371-suppl01.pdf]

**Appendix A. GRADEPro certainty of evidence table**

| Number of studies               | Study design      | Certainty assessment      |                           |              |             |                      | Number of patients |         | Effect           |                                             | Certainty        |
|---------------------------------|-------------------|---------------------------|---------------------------|--------------|-------------|----------------------|--------------------|---------|------------------|---------------------------------------------|------------------|
|                                 |                   | Risk of bias              | Inconsistency             | Indirectness | Imprecision | Other considerations | Gratitude          | Control | Relative (95%CI) | Absolute (95%CI)                            |                  |
| GQ-6 total score                |                   |                           |                           |              |             |                      |                    |         |                  |                                             |                  |
| 13                              | Randomized trials | Very serious <sup>a</sup> | Serious <sup>b</sup>      | Not serious  | Not serious | None                 | 790                | 696     | -                | MD 1.54 higher (0.74 higher to 2.35 higher) | ⊕○○○<br>Very low |
| GQ-6 mean score                 |                   |                           |                           |              |             |                      |                    |         |                  |                                             |                  |
| 4                               | Randomized trials | Very serious <sup>a</sup> | Not serious               | Not serious  | Not serious | None                 | 387                | 360     | -                | MD 0.24 higher (0.11 higher to 0.37 higher) | ⊕⊕○○<br>Low      |
| Gratitude (numerical scale 1–7) |                   |                           |                           |              |             |                      |                    |         |                  |                                             |                  |
| 9                               | Randomized trials | Very serious <sup>a</sup> | Very serious <sup>c</sup> | Not serious  | Not serious | None                 | 889                | 913     | -                | MD 0.4 higher (0.17 higher to 0.64 higher)  | ⊕○○○<br>Very low |
| SWLS mean score                 |                   |                           |                           |              |             |                      |                    |         |                  |                                             |                  |
| 2                               | Randomized trials | Very serious <sup>a</sup> | Not serious               | Not serious  | Not serious | None                 | 147                | 136     | -                | MD 0.48 higher (0.21 higher to 0.75 higher) | ⊕⊕○○<br>Low      |
| GAD-7                           |                   |                           |                           |              |             |                      |                    |         |                  |                                             |                  |
| 3                               | Randomized trials | Very serious <sup>a</sup> | Not serious               | Not serious  | Not serious | None                 | 298                | 281     | -                | MD 1.63 lower (2.37 lower to 0.89 lower)    | ⊕⊕○○<br>Low      |
| MHC-SF                          |                   |                           |                           |              |             |                      |                    |         |                  |                                             |                  |
| 3                               | Randomized trials | Very serious <sup>a</sup> | Not serious               | Not serious  | Not serious | None                 | 243                | 240     | -                | MD 0.29 higher (0.17 higher to 0.41 higher) | ⊕⊕○○<br>Low      |
| PHQ-9                           |                   |                           |                           |              |             |                      |                    |         |                  |                                             |                  |
| 3                               | Randomized trials | Very serious <sup>a</sup> | Not serious               | Not serious  | not serious | none                 | 289                | 236     | -                | MD 1.86 lower (2.89 lower to 0.83 lower)    | ⊕⊕○○<br>Low      |

95%CI: 95% confidence interval; MD: mean difference; PHQ-9: Patient Health Questionnaire; MHC-SF: Mental Health Continuum-Short Form; GAD-7: Generalized Anxiety Disorder; SWLS: Satisfaction With Life Scale; GQ-6: Gratitude Questionnaire-Six-Item Form.

Explanations:

a. Studies did not blind participants or evaluators; losses >20%; protocol analysis.

b. I<sup>2</sup> between 50-75%.

c. I<sup>2</sup> >75%.

**Appendix B. Study characteristics**

| Author                            | Population                                                                        | Type of intervention | Intervention                            | Comparison                                                      | Outcomes                                                                                                                                                                                | Follow-up    |
|-----------------------------------|-----------------------------------------------------------------------------------|----------------------|-----------------------------------------|-----------------------------------------------------------------|-----------------------------------------------------------------------------------------------------------------------------------------------------------------------------------------|--------------|
| Emmons et al. <sup>(11)</sup>     | Students (n=196)                                                                  | Isolated             | Gratitude intervention (n=65)           | Hassles (n=64) and control (n=67)                               | Well-being; gratitude; physical symptoms; gratitude                                                                                                                                     | 9 weeks      |
|                                   | Students (n=157)                                                                  | Isolated             | Gratitude intervention (n=52)           | Hassles (N=49) and control (n=56)                               | Health and prosocial behavior                                                                                                                                                           | 2 weeks      |
|                                   | Patients with neuromuscular diseases (n=65)                                       | Isolated             | Gratitude intervention (n=33)           | Control (n=32)                                                  | Affect; well-being; health behavior; daily activities                                                                                                                                   | 3 weeks      |
| Antoine et al. <sup>(10)</sup>    | Couples (n=76)                                                                    | Combined             | Positive psychology intervention (n=40) | Control (n=36)                                                  | Satisfaction (SWLS)                                                                                                                                                                     | 1 month      |
| Baker et al. <sup>(11)</sup>      | Workers (n=188)                                                                   | Isolated             | Gratitude intervention (n=90)           | Control (n=98)                                                  | Gratitude (numeric scale); affect (PANAS); well-being (numeric scale); satisfaction; commitment                                                                                         | 5 weeks      |
| Bartlett et al. <sup>(12)</sup>   | Adults with an average age of 73 years (n=42)                                     | Isolated             | Daily gratitude exercise (n=23)         | Only surveys completions (n=19)                                 | Gratitude (GQ-6); solitude (PANAS); subjective well-being; subjective health; symptoms; daily activities; general positivity                                                            | 3 weeks      |
| Bohlmeijer et al. <sup>(13)</sup> | People with moderate / low well-being and moderate depression and anxiety (n=217) | Isolated             | Gratitude exercises (n=73)              | Self-love act (n=73)<br>Waiting list (n=71)                     | Well-being (MHC-SF); depression (CES-D); anxiety (GAD-7); gratitude (GQ-6, numeric scale)                                                                                               | 6 months     |
| Cheng et al. <sup>(14)</sup>      | Health professionals (n=102)                                                      | Isolated             | Gratitude diary (n=34)                  | Hassle diary (n=34) or no treatment (n=34)                      | Depression (CES-D); stress (PSS)                                                                                                                                                        | 3 months     |
| Cunha et al. <sup>(15)</sup>      | Adults with an average age of 32 years (n=1,337)                                  | Isolated             | Gratitude stimulation (n=446)           | Hassles (n=444) and neutral (n=447)                             | Affect (PANAS); depression (CES-D); happiness (SHS); satisfaction (SWLS)                                                                                                                | 4 weeks      |
| Datu et al. <sup>(16)</sup>       | Students (n=86)                                                                   | Isolated             | List 5 things you are grateful (n=43)   | Weekly diary (n=43)                                             | Positive and negative emotions; life satisfaction                                                                                                                                       | 3 weeks      |
| Dennis et al. <sup>(17)</sup>     | Participants during lockdown (n=216)                                              | Isolated             | Gratitude intervention (n=67)           | Best possible self (n=73)<br>Nostalgia (n=63)<br>Control (n=58) | Affect (PANAS)                                                                                                                                                                          | No follow-up |
| DeSteno et al. <sup>(18)</sup>    | Adults with an average age of 19 years (n=75)                                     | Isolated             | Gratitude stimulation (n=25)            | Induction of happiness (n=25) and neutral (n=25)                | Gratitude and happiness                                                                                                                                                                 | No follow-up |
| Ducasse et al. <sup>(19)</sup>    | Patients hospitalized for suicidal attempt or ideation (n=201)                    | Isolated             | Gratitude writing (n=101)               | Food diary (n=100)                                              | Psychological pain (numeric scale); severity and intensity of suicidal ideation (C-SSRS; SSI; numeric scale); hope and optimism; depression and anxiety (BDI)                           | 1 weeks      |
| Froh et al. <sup>(20)</sup>       | Students (n=89)                                                                   | Isolated             | Gratitude intervention (n=44)           | Control (n=45)                                                  | Gratitude (GAC); affect (PANAS)                                                                                                                                                         | 2 months     |
| Gavian et al. <sup>(21)</sup>     | Students (n=271)                                                                  | Isolated             | Gratitude intervention (n=99)           | Relaxation intervention (n=84) and control (n=88)               | Gratitude (GQ-6); relaxation (RSRSI); affect (PANAS); satisfaction (SWLS); stress (PCOSES-8, DSI); serenity (SS); depression (DASS-21); physical symptoms (CHIPS); events gravity (SES) | 1 month      |
| Geraghty et al. <sup>(22)</sup>   | Participants (n=447)                                                              | Isolated             | Gratitude diary (n=170)                 | Automatic thinking (n=147)<br>Waiting list (n=130)              | Loss of adhesion; depression (PHQ-9); automatic thinking (ATQ); satisfaction (SWLS); affect (PANAS); health control (MHLC); expectation                                                 | 2 weeks      |
|                                   | Participants (n=247)                                                              | Isolated             | Gratitude diary (n=93)                  | Worry (n=74)<br>Waiting list (n=80)                             | Loss of adhesion; worry (PSWQ-PW); anxiety (GAD-7); depression (PHQ-9); hope (AHS); optimism (LOT -R); expectation; auto-control                                                        | 2 weeks      |

continue...

...Continuation

**Appendix B. Study characteristics**

| Author                             | Population                                          | Type of intervention | Intervention                                                                                                                               | Comparison                                                                              | Outcomes                                                                                                                                                                                          | Follow-up               |
|------------------------------------|-----------------------------------------------------|----------------------|--------------------------------------------------------------------------------------------------------------------------------------------|-----------------------------------------------------------------------------------------|---------------------------------------------------------------------------------------------------------------------------------------------------------------------------------------------------|-------------------------|
| Grant et al. <sup>[23]</sup>       | Students (n=69)                                     | Isolated             | Gratitude intervention (n=35)                                                                                                              | Control (n=34)                                                                          | Prosocial behavior, self-efficacy, social function, affect, gratitude                                                                                                                             | No follow-up            |
|                                    | Students (n=57)                                     | Isolated             | Gratitude intervention (n=29)                                                                                                              | Control (n=28)                                                                          |                                                                                                                                                                                                   |                         |
|                                    | Fundraisers (n=41)                                  | Isolated             | Gratitude intervention (n=20)                                                                                                              | Control (n=21)                                                                          | Prosocial behavior, self-efficacy, social function                                                                                                                                                |                         |
|                                    | Students (n=79)                                     | Isolated             | Gratitude intervention (n=40)                                                                                                              | Control (n=39)                                                                          | Prosocial behavior, self-efficacy, social function, gratitude                                                                                                                                     |                         |
| Gulliford et al. <sup>[24]</sup>   | Participants (n=52)                                 | Isolated             | Gratitude intervention (n=25)                                                                                                              | Pride (n= 25)                                                                           | Gratitude (GRAT-S, MCGM)                                                                                                                                                                          | No follow-up            |
| Heckendorff et al. <sup>[25]</sup> | Adults with an average age of 42 years (n=262)      | Isolated             | Gratitude training based on smartphone usage and online (n=132)                                                                            | Waiting list (n=130)                                                                    | Negative thoughts (PTQ); depression (CES-D); anxiety (GAD-7); resilience (CD-RISC); insomnia (ISI); worry (PSWQ); social support (BSSS); gratitude (GQ-6); optimism (LOT-R); satisfaction (CSQ-I) | 6 weeks; 3 and 6 months |
| Heekerens et al. <sup>[26]</sup>   | Adults with an average age of 43 years (n=211)      | Isolated             | Letter of interpersonal gratitude (n=105)                                                                                                  | Weekly diary (n=106)                                                                    | Gratitude (GQ-6)                                                                                                                                                                                  | No follow-up            |
| Heintzelman et al. <sup>[27]</sup> | Adults with an average age of 49 years (n=55)       | Combined             | Face-to-face ENHANCE (central self, experiential self, social self, reflection, person-activity adequacy and development of habits) (n=27) | Waiting list (n=28)                                                                     | Subjective well-being (SWB); life satisfaction (SWLS and scales); life events (PNMT); psychological health (depression and stress)                                                                | 3 months                |
|                                    | Adults with an average age of 43 years (n=100)      | Combined             | Online ENHANCE (n=50)                                                                                                                      | Waiting list (n=50)                                                                     |                                                                                                                                                                                                   |                         |
| Hirshberg et al. <sup>[28]</sup>   | Students (n=162)                                    | Isolated             | Gratitude stimulation (n=41)                                                                                                               | Breathing exercise (n=34); stimulating kindness and love (n=42); no intervention (n=39) | Anxiety (ASI); gratitude (GQ-6); affect (IPANAT, PANAS); stress                                                                                                                                   | No follow-up            |
| Ho et al. <sup>[29]</sup>          | Clusters (n=1,261)                                  | Combined             | Positive psychology intervention: joy, gratitude, flow, taste and listen (n=828)                                                           | Control (n=433)                                                                         | Happiness (SHS), quality of life (SF-12v2)                                                                                                                                                        | 12 weeks                |
|                                    |                                                     | Combined             |                                                                                                                                            |                                                                                         | Family communication (FCS); health, happiness and family harmony                                                                                                                                  |                         |
| Hülsing et al. <sup>[30]</sup>     | Participants (n=170)                                | Isolated             | Gratitude intervention (n=85)                                                                                                              | Waiting list (n=85)                                                                     | Gratitude (GRAT-S); well-being (MHC-SF)                                                                                                                                                           | 12 weeks                |
| Hussong et al. <sup>[31]</sup>     | Parents with children between 6 and 9 years (n=104) | Isolated             | Gratitude conversation program (n=53)                                                                                                      | Waiting list (n=51)                                                                     | Clarity and satisfaction; behavioral intentions; parental trust; knowledge consumption; socialization behaviors; children's gratitude; father-son gratitude and missed opportunities.             | 1 month                 |
| Jackowska et al. <sup>[32]</sup>   | Women with sleep and emotional disorders (n=119)    | Isolated             | Gratitude writing (n=40)                                                                                                                   | Reporting of daily events (n=41) and no treatment (n=38)                                | Well-being (SWB); PESS; HADS; FS; RLOT); sleep (PSQI; quality)                                                                                                                                    | 3 weeks                 |
| Kanagawa et al. <sup>[33]</sup>    | College students (n=79)                             | Isolated             | Letter of interpersonal gratitude (n=26)                                                                                                   | Setting self-help goals and planning intervention (n=26)<br>Control (n=26)              | Depression (PHQ-9)                                                                                                                                                                                | 4 weeks                 |
| Karns et al. <sup>[34]</sup>       | Students (n=33)                                     | Isolated             | Gratitude intervention (n=16)                                                                                                              | Control (n=17)                                                                          | Gratitude (GQ-6); altruism (principles of care)                                                                                                                                                   | 3 weeks                 |
| Ki et al. <sup>[35]</sup>          | Health professionals (n=180)                        | Isolated             | Gratitude intervention (n=90)                                                                                                              | Hassle (n=90)                                                                           | Stress (PSS); gratitude (GQ-6); affect (CAS); satisfaction (SWLS); depression (CES-D 10);                                                                                                         | 1 week                  |
| Kini et al. <sup>[36]</sup>        | Psychotherapy patients (n=43)                       | Isolated             | Gratitude diary (n=22)                                                                                                                     | Psychotherapy (n=21)                                                                    | Gratitude (GQ-6; GAC3; BHM-20)                                                                                                                                                                    | 12 weeks                |
| Kloppenborg et al. <sup>[37]</sup> | Participants (n=169)                                | Isolated             | Gratitude intervention (n=85)                                                                                                              | Waiting list (n=84)                                                                     | Well-being (MHC-SF); gratitude (numeric scale)                                                                                                                                                    | 6 weeks                 |
| Koay et al. <sup>[38]</sup>        | College students (n=33)                             | Isolated             | Post pictures with gratitude captions (n=16)                                                                                               | Control (n=17)                                                                          | Gratitude (GQ-6); stress (PSS); satisfaction (SWLS)                                                                                                                                               | 1 week                  |

continue...

...Continuation

**Appendix B. Study characteristics**

| Author                                 | Population                                                                                       | Type of intervention | Intervention                                                                                    | Comparison                                                              | Outcomes                                                                                                                                                         | Follow-up      |
|----------------------------------------|--------------------------------------------------------------------------------------------------|----------------------|-------------------------------------------------------------------------------------------------|-------------------------------------------------------------------------|------------------------------------------------------------------------------------------------------------------------------------------------------------------|----------------|
| Kobayashi et al. <sup>(39)</sup>       | College students (n=66)                                                                          | Isolated             | Think 3 things that make feel grateful to parents (n=22)<br>Express gratitude to parents (n=22) | Control (n=22)                                                          | Happiness (SHS); satisfaction (SWLS)                                                                                                                             | 1 week         |
| Krentzman et al. <sup>(40)</sup>       | Adults with alcohol abuse (n=23)                                                                 | Isolated             | Gratitude intervention (n=11)                                                                   | Control (n=12)                                                          | Feasibility and acceptance; affect (PANAS); gratitude (GQ-6); cognition                                                                                          | 8 and 14 weeks |
| Kwok et al. <sup>(41)</sup>            | Children with depression (n=68)                                                                  | Combined             | Sessions of gratitude and hope (n=34)                                                           | Control (n=34)                                                          | Gratitude (GQ-6); depression (HADS); satisfaction (SWLS)                                                                                                         | 8 weeks        |
| Lai et al. <sup>(42)</sup>             | Participants (n=108)                                                                             | Isolated             | Gratitude diary (n=51)                                                                          | Control (n=57)                                                          | Gratitude (GQ-6, GAC); affect (PANAS)                                                                                                                            | 3 weeks        |
| Mao et al. <sup>(43)</sup>             | Students (n=205)                                                                                 | Isolated             | High-gratitude priming (n=110)                                                                  | Control (n=95)                                                          | Gratitude (GQ-6)                                                                                                                                                 | No follow-up   |
| Martínez-Martí et al. <sup>(44)</sup>  | Students (n=105)                                                                                 | Isolated             | Gratitude intervention (n=41)                                                                   | Hassle report (n=30) and no intervention (n=34)                         | Gratitude, affect, well-being, physical symptoms, pain, sleep, relationship quality, perception of the needs of others                                           | 2 weeks        |
| Matvienko-Sikar et al. <sup>(45)</sup> | Pregnant women in prenatal care (n=46)                                                           | Combined             | Gratitude diary and reflection audio (n=32)                                                     | Control (n=14)                                                          | Stress (PDQ and EPDS); gratitude (GDP); reflection (MAAS)                                                                                                        | 4.5 weeks      |
| Ng et al. <sup>(46)</sup>              | Adults with an average age of 20 years (n=212)<br>Adults with an average age of 31 years (n=331) | Isolated<br>Isolated | Gratitude stimulation (n=107)<br>Gratitude stimulation (n=111)                                  | Control (n=105)<br>Stimulus of joy (n=110); without stimulation (n=110) | Gratitude and humor<br>Gratitude, affect, and conformity                                                                                                         | No follow-up   |
| O'Connell et al. <sup>(47)</sup>       | College students (n=91)                                                                          | Isolated             | Gratitude diary (N=29)<br>Interpersonal gratitude diary (n=30)                                  | Control diary (n=32)                                                    | Gratitude (GQ-6); satisfaction (SWLS)                                                                                                                            | 1 month        |
| O'Connell et al. <sup>(48)</sup>       | Adults with an average age of 22 years (n=192)                                                   | Isolated             | Gratitude writing (n=47); writing and expressing gratitude (n=40)                               | Control (n=61)                                                          | Life satisfaction (SWLS); affect (SPANE); depression (CES-D 10); Gratitude (GQ-6); satisfaction in the relationship and expression of gratitude in relationships | 1 or 3 months  |
| Oishi et al. <sup>(49)</sup>           | Students with an average age of 22 years (n=336)                                                 | Isolated             | Gratitude writing (n=168)                                                                       | No gratitude writing (n=168)                                            | Happiness; satisfaction; pleasure; gratitude; appreciation; sadness; anger; indebtedness; shame and guilt                                                        | No follow-up   |
|                                        | Students with an average age of 20 years (n=218)                                                 | Isolated             | Gratitude writing (n=101)                                                                       | No gratitude writing (n=117)                                            |                                                                                                                                                                  |                |
|                                        | Students with an average age of 18 years (n=181)                                                 | Isolated             | Gratitude writing (n=85)                                                                        | No writing (n=96)                                                       |                                                                                                                                                                  |                |
| O'Leary et al. <sup>(50)</sup>         | Women (n=61)                                                                                     | Isolated             | Gratitude intervention (n=29)                                                                   | Reflection intervention (n=22); waiting list (n=10)                     | Stress (PSS); depression (EDS); happiness (SHS)                                                                                                                  | 5 weeks        |
| Osborn et al. <sup>(51)</sup>          | Students (mean age: 15 years) (n=103)                                                            | Combined             | Shamiri-Digital (n=50)                                                                          | Study abilities (n=53)                                                  | Depression (PHQ-8); anxiety (GAD-7); well-being (SWEM-WBS); happiness and optimism (EPOCH); viability and acceptance                                             | 2 weeks        |
| Otsuka et al. <sup>(52)</sup>          | Workers (n=76)                                                                                   | Isolated             | Gratitude intervention (n=38)                                                                   | Control (n=38)                                                          | Gratitude; affect (PANAS); life satisfaction (SWLS); happiness (SHS) and well-being                                                                              | 4 weeks        |
| Otto et al. <sup>(53)</sup>            | Patients with treated breast cancer (n=67)                                                       | Isolated             | Gratitude stimulation (n=34)                                                                    | Control (n=33)                                                          | Gratitude, positive affect, goal seeking, fear of recurrence and death                                                                                           | 1 and 3 months |
| Ouweneel et al. <sup>(54)</sup>        | Students with an average age of 21 years (n=50)                                                  | Isolated             | Gratitude intervention (n=25)                                                                   | Daily experience (n=25)                                                 | Emotions (JAWS); commitment (UWES-S)                                                                                                                             | 5 weeks        |

continue...

...Continuation

**Appendix B. Study characteristics**

| Author                           | Population                                            | Type of intervention | Intervention                                                                                          | Comparison                                                                    | Outcomes                                                                                                                        | Follow-up           |
|----------------------------------|-------------------------------------------------------|----------------------|-------------------------------------------------------------------------------------------------------|-------------------------------------------------------------------------------|---------------------------------------------------------------------------------------------------------------------------------|---------------------|
| Owens et al. <sup>(56)</sup>     | Children aged 5 to 11 years (n=62)                    | Isolated             | Gratitude intervention (n=22)                                                                         | Best condition (n=23); Daily (n=17)                                           | Affect (PANAS-C); satisfaction (BMSLSS); self-esteem (PCS-C)                                                                    | 1 weeks             |
| Proyer et al. <sup>(56)</sup>    | Women (n=163)                                         | Isolated             | Gratitude visits (n=30)                                                                               | 3 good things (n=44); 3 funny things (n=20); strengths (n=35); control (n=34) | Happiness (AHI); depression (CES-D)                                                                                             | 6 meses             |
| Ramírez et al. <sup>(57)</sup>   | Elderly (n=56)                                        | Combined             | Program based on forgiveness, gratitude, and life review (n=28)                                       | Control (n=28)                                                                | Anxiety (STAI); depression (Beck Depression Inventory, BDI); memory (AMT); cognition (MEC); satisfaction (LSS); happiness (SHS) | 4 months            |
| Redwine et al. <sup>(58)</sup>   | Heart failure patients (n=70)                         | Isolated             | Gratitude diary (n=34)                                                                                | Usual care (n=36)                                                             | Gratitude (GQ-6); exercise activities (LTEQ)                                                                                    | 8 weeks             |
| Renshaw et al. <sup>(59)</sup>   | College students (n=97)                               | Isolated             | Gratitude thoughts (n=54)                                                                             | Control (n=43)                                                                | Gratitude (GQ-6); satisfaction (SWLS); happiness (SHS); affect (PANAS)                                                          | 2 weeks             |
| Riskin et al. <sup>(60)</sup>    | 43 teams of neonatal ICU workers (n=163)              | Isolated             | Expression of gratitude by physicians and mothers (n=40), only mothers (n=42), only physicians (n=43) | Neutral expression (n=38)                                                     | Team performance (diagnosis, treatment, sharing)                                                                                | No follow-up        |
| Roth et al. <sup>(61)</sup>      | Children (n=42)                                       | Combined             | Positive psychology intervention (n=21)                                                               | Control (n=21)                                                                | Satisfaction (BMSLSS); affect (PANAS)                                                                                           | 10 weeks + 2 months |
| Schache et al. <sup>(62)</sup>   | Teenagers with <i>diabetes mellitus</i> type 1 (n=80) | Isolated             | Daily gratitude record (n=40)                                                                         | Usual care (n=40)                                                             | Stress (DSQY); depression (CESDSC); quality of life (DQLYS); self-care (SCIRV); gratitude (GQ-6)                                | 12 weeks            |
| Shin et al. <sup>(63)</sup>      | Participants (n=630)                                  | Isolated             | Letters of gratitude to parents (n=305)                                                               | Control (n=325)                                                               | Affect (PANAS); Gratitude (GAC)                                                                                                 | 2 weeks             |
| Tan et al. <sup>(64)</sup>       | Adults with stage III or IV cancer (n=92)             | Isolated             | Gratitude diary (n=49)                                                                                | Control diary (n=43)                                                          | Gratitude (GQ-6)                                                                                                                | 1 week              |
| Toepfer et al. <sup>(65)</sup>   | Participants (n=219)                                  | Isolated             | Gratitude intervention (n=141)                                                                        | Control (n=78)                                                                | Gratitude (GQ-6); satisfaction (SWLS); happiness (SHS); depression (CES-10)                                                     | 4 weeks             |
| Tofangchi et al. <sup>(66)</sup> | Participants (n=32)                                   | Isolated             | Gratitude intervention (n=16)                                                                         | Control (n=16)                                                                | Happiness (OHQ)                                                                                                                 | 40 days             |
| Vayness et al. <sup>(67)</sup>   | People with an average age of 19 years (n=96)         | Isolated             | Induction of gratitude emotion (n=32)                                                                 | Induction of happiness (n=32) and neutral (n=32)                              | Happiness and gratitude                                                                                                         | No follow-up        |
|                                  | Workers with an average age of 35 years (n=143)       | Isolated             | Induction of gratitude emotion (n=64)                                                                 | Induction of happiness (n=42) and neutral (n=37)                              | Happiness and gratitude                                                                                                         | No follow-up        |
| Vogelsang et al. <sup>(68)</sup> | Participants (n=169)                                  | Isolated             | Gratitude intervention (n=85)                                                                         | Control (n=84)                                                                | Gratitude (numeric scale)                                                                                                       | 6 weeks             |
| Völler et al. <sup>(69)</sup>    | Participants (n=118)                                  | Isolated             | Gratitude intervention (n=51)                                                                         | Control (n=67)                                                                | Stress (PSS); well-being (MHC-SF)                                                                                               | 12 weeks            |
| Williams et al. <sup>(70)</sup>  | Students (n=70)                                       | Isolated             | Gratitude expression (n=30)                                                                           | Control (n=40)                                                                | Appreciation; interpersonal warmth; capacity of expression; affiliation intention                                               | No follow-up        |
| Wong et al. <sup>(71)</sup>      | Psychotherapy patients (n=293)                        | Isolated             | 3 sessions of gratitude writing (n=127)                                                               | Expression writing (n=91); psychotherapy only (n=75)                          | Well-being, psychological symptoms, life function (BHM-20 and GMH); negative and positive emotions (LIWC)                       | 12 weeks            |
| Yang et al. <sup>(72)</sup>      | Chinese prisoners (n=144)                             | Isolated             | Gratitude intervention (n=48)                                                                         | Kindness intervention (n=48); no intervention (n=48)                          | Affect (ABS); satisfaction (SWLS); well-being (IWB); subjective vitality (RFS)                                                  | 6 weeks             |

**Appendix C.** Risk of bias summary for the included studies

| Author                                 | Randomization | Allocation Concealment | Double blinding | Evaluators blinding | Losses (<20%) | Prognostic characteristics | Appropriate outcomes | ITT | Sample calculation | Early interruption |
|----------------------------------------|---------------|------------------------|-----------------|---------------------|---------------|----------------------------|----------------------|-----|--------------------|--------------------|
| Emmons et al. <sup>(11)</sup>          | ?             | ?                      | -               | ?                   | ?             | ?                          | +                    | ?   | ?                  | ?                  |
| Antoine et al. <sup>(10)</sup>         | ?             | ?                      | -               | ?                   | +             | +                          | +                    | +   | -                  | +                  |
| Baker et al. <sup>(11)</sup>           | ?             | ?                      | -               | ?                   | ?             | ?                          | +                    | ?   | -                  | ?                  |
| Bartlett et al. <sup>(12)</sup>        | -             | -                      | +               | ?                   | ?             | ?                          | +                    | ?   | ?                  | +                  |
| Bohlmeijer et al. <sup>(13)</sup>      | +             | +                      | -               | ?                   | -             | +                          | +                    | -   | +                  | +                  |
| Cheng et al. <sup>(14)</sup>           | +             | +                      | -               | ?                   | +             | +                          | +                    | +   | +                  | +                  |
| Cunha et al. <sup>(15)</sup>           | +             | +                      | -               | ?                   | -             | ?                          | +                    | -   | +                  | +                  |
| Datu et al. <sup>(16)</sup>            | -             | -                      | -               | ?                   | +             | -                          | +                    | -   | -                  | +                  |
| Dennis et al. <sup>(17)</sup>          | +             | +                      | -               | ?                   | +             | +                          | +                    | +   | +                  | +                  |
| DeSteno et al. <sup>(18)</sup>         | ?             | ?                      | -               | ?                   | ?             | ?                          | +                    | ?   | ?                  | ?                  |
| Ducasse et al. <sup>(19)</sup>         | +             | +                      | -               | +                   | +             | +                          | +                    | -   | -                  | -                  |
| Froh et al. <sup>(20)</sup>            | ?             | ?                      | -               | ?                   | ?             | +                          | +                    | ?   | -                  | ?                  |
| Gavian et al. <sup>(21)</sup>          | +             | +                      | -               | ?                   | +             | +                          | +                    | -   | +                  | ?                  |
| Geraghty et al. <sup>(22)</sup>        | +             | +                      | -               | ?                   | -             | ?                          | +                    | -   | -                  | ?                  |
| Grant et al. <sup>(23)</sup>           | ?             | ?                      | -               | ?                   | ?             | ?                          | +                    | ?   | ?                  | ?                  |
| Gulliford et al. <sup>(24)</sup>       | ?             | ?                      | -               | ?                   | -             | -                          | +                    | -   | -                  | +                  |
| Heckendorf et al. <sup>(25)</sup>      | +             | +                      | -               | ?                   | -             | +                          | +                    | +   | +                  | +                  |
| Heekerens et al. <sup>(26)</sup>       | +             | +                      | -               | ?                   | +             | -                          | +                    | +   | -                  | +                  |
| Heintzelman et al. <sup>(27)</sup>     | ?             | ?                      | -               | ?                   | -             | ?                          | +                    | +   | +                  | +                  |
| Hirshberg et al. <sup>(28)</sup>       | +             | +                      | -               | ?                   | +             | +                          | +                    | -   | +                  | +                  |
| Ho et al. <sup>(29)</sup>              | +             | +                      | -               | ?                   | ?             | +                          | +                    | ?   | -                  | +                  |
| Hülsing et al. <sup>(30)</sup>         | ?             | ?                      | -               | ?                   | -             | +                          | +                    | -   | -                  | +                  |
| Hussong et al. <sup>(31)</sup>         | ?             | ?                      | -               | ?                   | +             | ?                          | +                    | ?   | ?                  | +                  |
| Jackowska et al. <sup>(32)</sup>       | +             | +                      | -               | ?                   | ?             | +                          | +                    | ?   | -                  | +                  |
| Kanagawa et al. <sup>(33)</sup>        | ?             | ?                      | -               | ?                   | +             | +                          | +                    | +   | +                  | +                  |
| Karns et al. <sup>(34)</sup>           | ?             | ?                      | -               | ?                   | +             | +                          | +                    | ?   | -                  | +                  |
| Ki et al. <sup>(35)</sup>              | ?             | ?                      | -               | ?                   | ?             | ?                          | +                    | ?   | -                  | ?                  |
| Kini et al. <sup>(36)</sup>            | ?             | ?                      | -               | ?                   | ?             | +                          | +                    | ?   | -                  | +                  |
| Kloppenborg et al. <sup>(37)</sup>     | +             | +                      | -               | ?                   | +             | +                          | +                    | +   | +                  | +                  |
| Koay et al. <sup>(38)</sup>            | ?             | ?                      | -               | ?                   | +             | -                          | +                    | +   | -                  | +                  |
| Kobayashi et al. <sup>(39)</sup>       | ?             | ?                      | -               | ?                   | +             | -                          | +                    | +   | -                  | +                  |
| Krentzman et al. <sup>(40)</sup>       | ?             | ?                      | -               | ?                   | ?             | ?                          | +                    | ?   | ?                  | ?                  |
| Kwok et al. <sup>(41)</sup>            | ?             | ?                      | -               | ?                   | +             | +                          | +                    | +   | -                  | +                  |
| Lai et al. <sup>(42)</sup>             | ?             | ?                      | -               | ?                   | +             | +                          | +                    | +   | -                  | +                  |
| Mao et al. <sup>(43)</sup>             | ?             | ?                      | -               | ?                   | +             | -                          | +                    | +   | +                  | +                  |
| Martínez-Martí et al. <sup>(44)</sup>  | ?             | ?                      | -               | ?                   | ?             | ?                          | +                    | ?   | ?                  | ?                  |
| Matvienko-Sikar et al. <sup>(45)</sup> | +             | +                      | -               | ?                   | -             | +                          | +                    | -   | +                  | +                  |
| Ng et al. <sup>(46)</sup>              | ?             | ?                      | -               | ?                   | ?             | ?                          | +                    | ?   | +                  | +                  |
| O'Connell et al. <sup>(47)</sup>       | +             | +                      | -               | ?                   | -             | +                          | +                    | +   | +                  | +                  |
| O'Connell et al. <sup>(48)</sup>       | +             | +                      | +               | ?                   | +             | +                          | +                    | -   | -                  | +                  |
| Oishi et al. <sup>(49)</sup>           | ?             | ?                      | -               | ?                   | ?             | ?                          | +                    | ?   | +                  | +                  |
| O'Leary et al. <sup>(50)</sup>         | ?             | ?                      | -               | ?                   | ?             | ?                          | +                    | ?   | ?                  | ?                  |
| Osborn et al. <sup>(51)</sup>          | +             | +                      | -               | ?                   | +             | +                          | +                    | +   | -                  | +                  |
| Otsuka et al. <sup>(52)</sup>          | ?             | ?                      | -               | ?                   | ?             | ?                          | +                    | ?   | -                  | +                  |
| Otto et al. <sup>(53)</sup>            | ?             | ?                      | -               | ?                   | ?             | ?                          | +                    | ?   | -                  | +                  |
| Ouweneel et al. <sup>(54)</sup>        | ?             | ?                      | -               | ?                   | ?             | +                          | +                    | ?   | ?                  | ?                  |
| Owens et al. <sup>(55)</sup>           | ?             | ?                      | -               | ?                   | ?             | ?                          | +                    | ?   | ?                  | ?                  |
| Proyer et al. <sup>(56)</sup>          | ?             | ?                      | -               | ?                   | ?             | +                          | +                    | ?   | +                  | ?                  |

continue...

...Continuation

**Appendix C.** Risk of bias summary for the included studies

| Author                           | Randomization | Allocation Concealment | Double blinding | Evaluators blinding | Losses (<20%) | Prognostic characteristics | Appropriate outcomes | ITT | Sample calculation | Early interruption |
|----------------------------------|---------------|------------------------|-----------------|---------------------|---------------|----------------------------|----------------------|-----|--------------------|--------------------|
| Ramírez et al. <sup>(67)</sup>   | ?             | ?                      | -               | ?                   | ?             | ?                          | +                    | ?   | ?                  | ?                  |
| Redwine et al. <sup>(68)</sup>   | +             | +                      | -               | ?                   | -             | +                          | +                    | -   | +                  | +                  |
| Renshaw et al. <sup>(69)</sup>   | +             | +                      | -               | ?                   | ?             | +                          | +                    | ?   | ?                  | +                  |
| Riskin et al. <sup>(60)</sup>    | +             | ?                      | -               | ?                   | ?             | +                          | -                    | ?   | +                  | +                  |
| Roth et al. <sup>(61)</sup>      | +             | +                      | -               | ?                   | +             | +                          | +                    | +   | ?                  | +                  |
| Schache et al. <sup>(62)</sup>   | +             | +                      | -               | ?                   | -             | +                          | +                    | +   | +                  | +                  |
| Shin et al. <sup>(63)</sup>      | ?             | ?                      | -               | ?                   | +             | +                          | +                    | -   | ?                  | +                  |
| Tan et al. <sup>(64)</sup>       | +             | +                      | -               | ?                   | +             | +                          | +                    | +   | +                  | +                  |
| Toepfer et al. <sup>(65)</sup>   | ?             | ?                      | -               | ?                   | ?             | ?                          | +                    | ?   | -                  | ?                  |
| Tofangchi et al. <sup>(66)</sup> | ?             | ?                      | -               | ?                   | ?             | ?                          | -                    | ?   | -                  | ?                  |
| Vayness et al. <sup>(67)</sup>   | ?             | ?                      | -               | ?                   | -             | ?                          | +                    | -   | +                  | +                  |
| Vogelsang et al. <sup>(68)</sup> | +             | +                      | -               | ?                   | -             | +                          | +                    | -   | ?                  | +                  |
| Völler et al. <sup>(69)</sup>    | ?             | ?                      | -               | ?                   | +             | +                          | +                    | +   | ?                  | +                  |
| Williams et al. <sup>(70)</sup>  | ?             | ?                      | -               | ?                   | ?             | ?                          | +                    | ?   | ?                  | ?                  |
| Wong et al. <sup>(71)</sup>      | ?             | ?                      | -               | ?                   | -             | ?                          | +                    | +   | -                  | +                  |
| Yang et al. <sup>(72)</sup>      | -             | -                      | -               | ?                   | ?             | +                          | +                    | ?   | -                  | +                  |

Note. +: High risk; -: Low risk; ?: Unclear risk; ITT: intention-to-treat analysis.
